# Supplementary material
Source: PubMed Central journal article supplement (PMC10985790)

**Figure S1: Full FACS gating strategy for collecting active immature and mature DGCs**

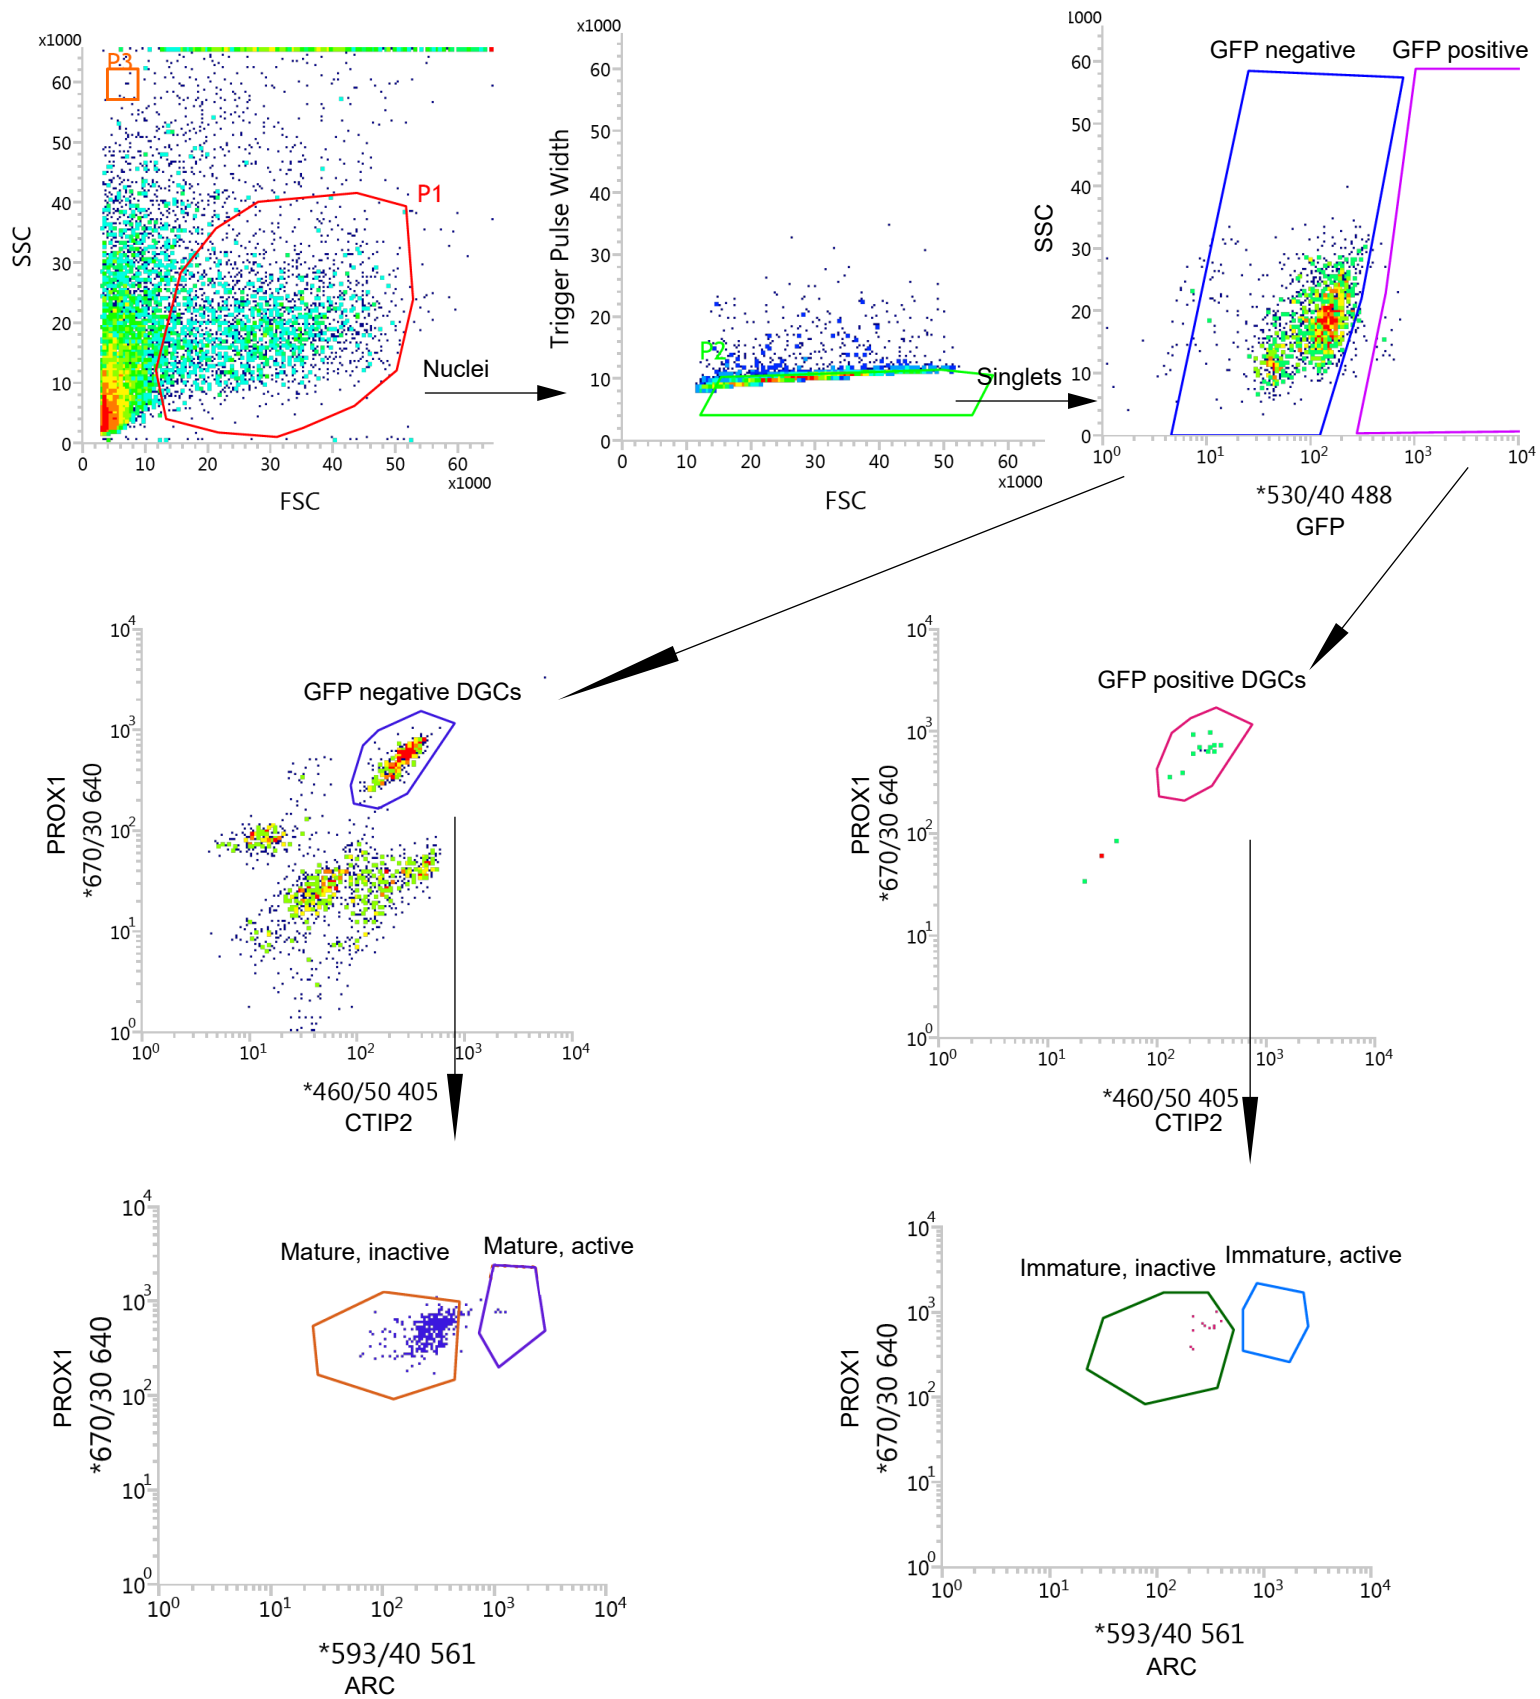

Supplement: NIHMS1980437-supplement-Suppl__fig__S1.pdf [file NIHMS1980437-supplement-Suppl__fig__S1.pdf]
